# Supplementary material for: Long-term trends in death and dependence after ischaemic strokes: A retrospective cohort study using the South London Stroke Register (SLSR)
Source: PubMed Central journal article supplement (PMC7067375; doi:10.1371/journal.pmed.1003048), 2020-03-12
Supplement: pmed.1003048.s002.pdf [file pmed.1003048.s002.pdf]

## **Supplementary Appendix**

### **Long-term trends in death and dependence after ischaemic strokes: a retrospective cohort study using the South London stroke register (SLSR)**

Hatem A Wafa, Charles D.A. Wolfe, Ajay Bhalla, Yanzhong Wang

## TABLE OF CONTENT

|                                                                                                   |    |
|---------------------------------------------------------------------------------------------------|----|
| <b>Table A:</b> Survival models for ISs, overall and by ethnic groups .....                       | 6  |
| <b>Table B:</b> Survival models for ISs by sex groups.....                                        | 8  |
| <b>Table C:</b> Survival models for ISs by age groups .....                                       | 10 |
| <b>Table D:</b> Trends in medication use among patients with IS .....                             | 11 |
| <b>Table E:</b> Medication use among patients with ISs by aetiological subtypes .....             | 11 |
| <b>Table F:</b> Differences between IS patients with complete BI at 3 months and those without .. | 12 |
| <b>Table G:</b> Trends in functional dependence (mRS $\geq 3$ ) .....                             | 13 |

|                                                                                                             |   |
|-------------------------------------------------------------------------------------------------------------|---|
| <b>Fig A:</b> Survival after IS stroke by TOAST aetiological subtypes, and age, sex, and ethnic groups..... | 3 |
| <b>Fig B:</b> Time-trends in survival after IS stroke by TOAST aetiological subtypes.....                   | 3 |
| <b>Fig C:</b> Time-trends in survival after IS stroke by sex groups.....                                    | 4 |
| <b>Fig D:</b> Time-trends in survival after IS stroke by ethnic groups .....                                | 4 |
| <b>Fig E:</b> Time-trends in survival after IS stroke by age groups.....                                    | 4 |

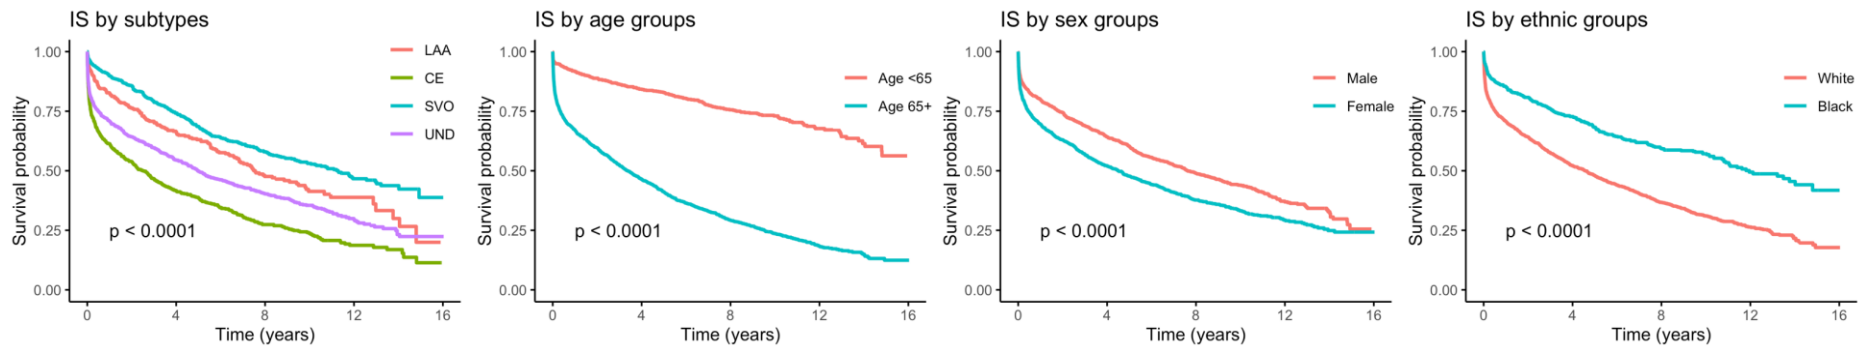

**Fig A: Survival after IS stroke by TOAST aetiological subtypes, and age, sex, and ethnic groups.**

P values were obtained from the log-rank tests (unadjusted).

Abbreviations: CE, cardio-embolism; IS, ischaemic stroke; LAA, large-artery atherosclerosis; SVO, small-vessel occlusion; TOAST, Trial of ORG 10172 in Acute Stroke Treatment; UND, undetermined aetiologies.

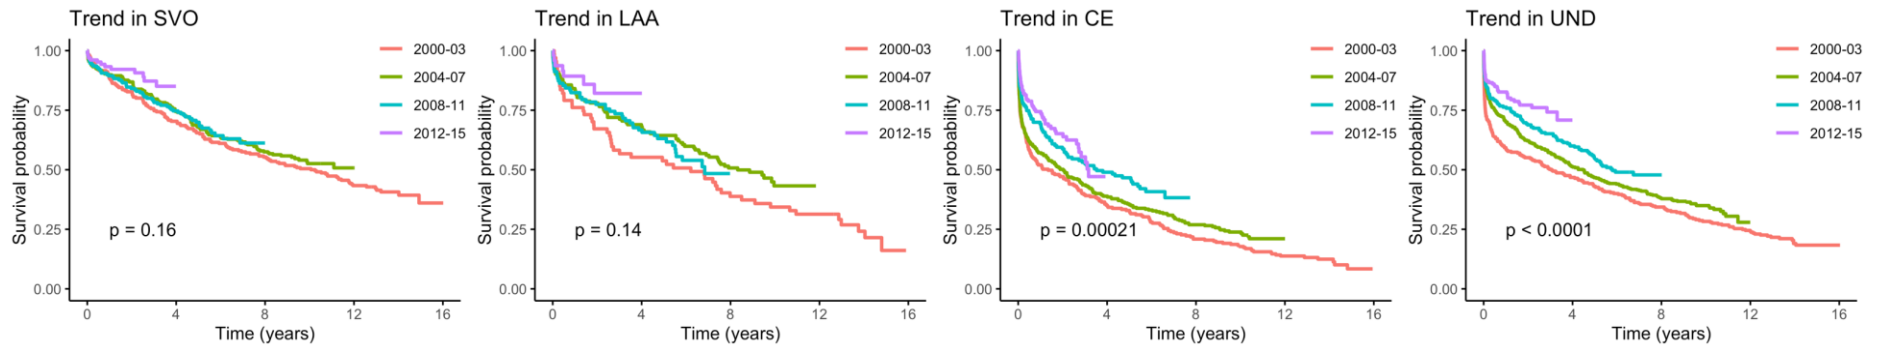

**Fig B: Time-trends in survival after IS stroke by TOAST aetiological subtypes.**

P values were obtained from the log-rank tests (unadjusted).

Abbreviations: CE, cardio-embolism; LAA, large-artery atherosclerosis; SVO, small-vessel occlusion; TOAST, Trial of ORG 10172 in Acute Stroke Treatment; UND, undetermined aetiologies.

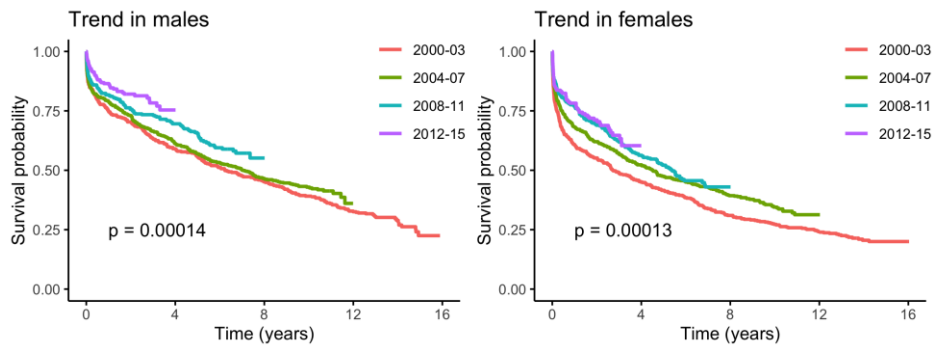

**Fig C: Time-trends in survival after IS stroke by sex groups.**

P values were obtained from the log-rank tests (unadjusted).

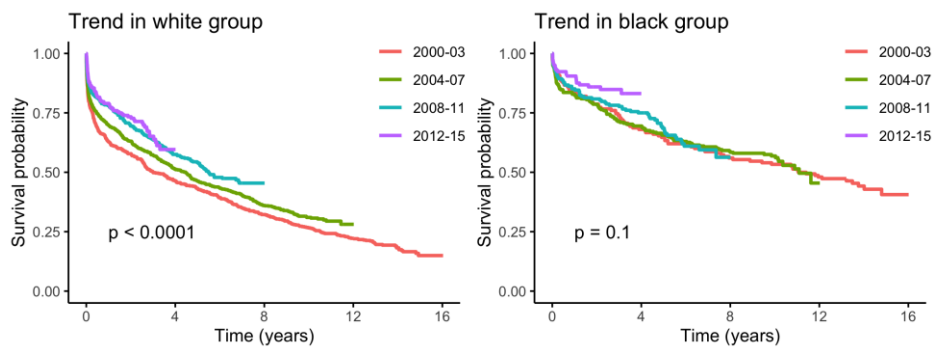

**Fig D: Time-trends in survival after IS stroke by ethnic groups.**

P values were obtained from the log-rank tests (unadjusted).

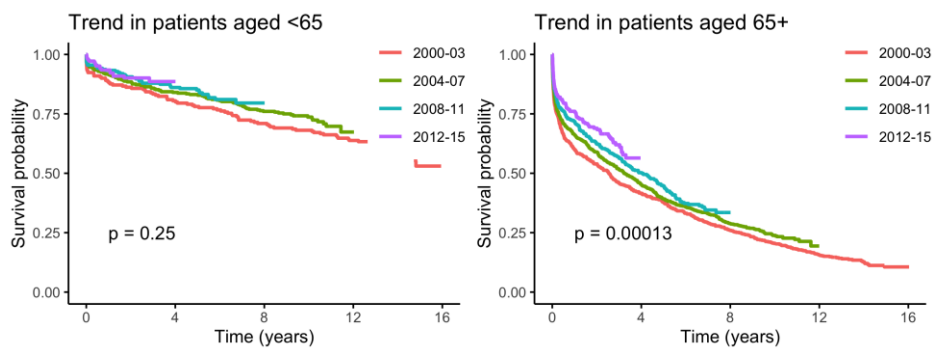

**Fig E: Time-trends in survival after IS stroke by age groups.**

P values were obtained from the log-rank tests (unadjusted).

|                                           | Overall             |          | White               |          | Black                  |          |
|-------------------------------------------|---------------------|----------|---------------------|----------|------------------------|----------|
|                                           | HR (95% CI)         | P Value  | HR (95% CI)         | P Value  | HR (95% CI)            | P Value  |
| <b>All ischaemic strokes (ISs)</b>        |                     |          |                     |          |                        |          |
| Time (year)                               | 0.976 (0.959–0.993) | 0.006*   | 0.978 (0.96–0.995)  | 0.013*   | 0.962 (0.929–0.996)    | 0.028*   |
| Age                                       | 1.063 (1.057–1.068) | <0.0001* | 1.066 (1.059–1.073) | <0.0001* | 1.059 (1.048–1.071)    | <0.0001* |
| Female (vs male)                          | 0.864 (0.775–0.962) | 0.008*   | 0.845 (0.744–0.96)  | 0.01*    | 0.832 (0.648–1.068)    | 0.15     |
| Black (vs white)                          | 0.836 (0.658–1.061) | 0.14     |                     |          |                        |          |
| Other (vs white)                          | 0.775 (0.55–1.094)  | 0.15     |                     |          |                        |          |
| Current drinker                           | 0.843 (0.754–0.942) | 0.003*   | 0.831 (0.732–0.944) | 0.004*   | 0.804 (0.608–1.064)    | 0.13     |
| Smoker                                    | 1.533 (1.35–1.74)   | <0.0001* | 1.482 (1.279–1.716) | <0.0001* | 1.813 (1.301–2.527)    | 0.0005*  |
| Hypertension                              | 0.967 (0.862–1.085) | 0.57     | 1.023 (0.9–1.163)   | 0.73     | 0.698 (0.51–0.957)     | 0.025*   |
| Diabetes mellitus                         | 1.273 (1.124–1.442) | 0.0001*  | 1.255 (1.078–1.461) | 0.003*   | 1.355 (1.044–1.758)    | 0.023*   |
| Hypercholesterolaemia                     | 0.939 (0.829–1.063) | 0.32     | 0.89 (0.77–1.027)   | 0.11     | 1.106 (0.819–1.493)    | 0.51     |
| Atrial fibrillation                       | 1.372 (1.205–1.562) | <0.0001* | 1.278 (1.109–1.474) | 0.0007*  | 1.803 (1.225–2.654)    | 0.003*   |
| Myocardial infarction                     | 1.231 (1.055–1.437) | 0.008*   | 1.267 (1.064–1.509) | 0.008*   | 1.446 (0.937–2.231)    | 0.1      |
| TIA                                       | 1.098 (0.945–1.277) | 0.22     | 1.029 (0.868–1.22)  | 0.74     | 1.418 (0.926–2.17)     | 0.11     |
| Stroke unit admission (vs none)           | 1.069 (0.869–1.314) | 0.53     | 1.079 (0.849–1.37)  | 0.53     | 1.351 (0.801–2.28)     | 0.26     |
| Other medical wards (vs none)             | 1.436 (1.158–1.78)  | 0.001*   | 1.392 (1.087–1.784) | 0.009*   | 1.473 (0.826–2.627)    | 0.19     |
| Anticoagulant                             | 0.952 (0.802–1.13)  | 0.58     | 0.983 (0.814–1.187) | 0.86     | 0.862 (0.559–1.329)    | 0.5      |
| Antiplatelet                              | 0.659 (0.542–0.801) | 0.0001*  | 0.696 (0.558–0.869) | 0.002*   | 0.539 (0.338–0.86)     | 0.011*   |
| Thrombolysis                              | 0.817 (0.655–1.02)  | 0.08     | 0.785 (0.606–1.016) | 0.07     | 0.824 (0.492–1.381)    | 0.46     |
| GCS                                       | 0.923 (0.902–0.944) | <0.0001* | 0.927 (0.903–0.953) | <0.0001* | 0.923 (0.869–0.98)     | 0.009*   |
| Failed swallowing                         | 1.318 (1.147–1.515) | 0.0001*  | 1.283 (1.097–1.501) | 0.002*   | 1.319 (0.912–1.907)    | 0.14     |
| Urinary incontinence                      | 1.199 (1.042–1.38)  | 0.012*   | 1.106 (0.943–1.297) | 0.21     | 1.495 (1.059–2.112)    | 0.023*   |
| BI (7d)                                   | 0.943 (0.931–0.955) | <0.0001* | 0.941 (0.928–0.955) | <0.0001* | 0.943 (0.917–0.969)    | <0.0001* |
| NIHSS                                     | 1.037 (1.025–1.049) | <0.0001* | 1.038 (1.024–1.052) | <0.0001* | 1.033 (1.004–1.063)    | 0.026*   |
| <b>Large artery atherosclerosis (LAA)</b> |                     |          |                     |          |                        |          |
| Time (year)                               | 0.979 (0.923–1.037) | 0.47     | 0.968 (0.91–1.029)  | 0.29     | 0.917 (0.702–1.198)    | 0.53     |
| Age                                       | 1.081 (1.062–1.1)   | <0.0001* | 1.075 (1.052–1.099) | <0.0001* | 1.15 (1.053–1.256)     | 0.002*   |
| Female (vs male)                          | 0.887 (0.624–1.263) | 0.51     | 0.968 (0.639–1.467) | 0.88     | 0.734 (0.203–2.65)     | 0.64     |
| Black (vs white)                          | 0.772 (0.32–1.861)  | 0.56     |                     |          |                        |          |
| Other (vs white)                          | 0.297 (0.089–0.991) | 0.048*   |                     |          |                        |          |
| Current drinker                           | 0.846 (0.579–1.235) | 0.39     | 0.84 (0.558–1.266)  | 0.4      | 0.58 (0.098–3.419)     | 0.55     |
| Smoker                                    | 1.643 (1.091–2.475) | 0.018*   | 1.531 (0.943–2.487) | 0.09     | 5.208 (0.727–37.316)   | 0.1      |
| Hypertension                              | 1.3 (0.889–1.9)     | 0.18     | 1.332 (0.869–2.042) | 0.19     | 3.143 (0.334–29.529)   | 0.32     |
| Diabetes mellitus                         | 1.777 (1.154–2.735) | 0.009*   | 1.568 (0.894–2.75)  | 0.12     | 12.807 (1.858–88.281)  | 0.011*   |
| Hypercholesterolaemia                     | 0.563 (0.362–0.875) | 0.011*   | 0.54 (0.322–0.907)  | 0.02*    | 0.404 (0.104–1.578)    | 0.19     |
| Atrial fibrillation                       | 1.798 (0.757–4.267) | 0.18     | 1.82 (0.717–4.617)  | 0.21     | 32.452 (1.113–946.419) | 0.044*   |
| Myocardial infarction                     | 1.72 (0.988–2.997)  | 0.06     | 1.548 (0.8–2.997)   | 0.19     | 3.126 (0.504–19.381)   | 0.22     |
| TIA                                       | 1.184 (0.753–1.862) | 0.47     | 1.194 (0.717–1.99)  | 0.5      | 3.575 (0.584–21.88)    | 0.17     |
| Stroke unit admission (vs none)           | 1.105 (0.503–2.424) | 0.8      | 1.074 (0.465–2.482) | 0.87     | 9782218.845 (0–Inf)    | 1        |
| Other medical wards (vs none)             | 1.28 (0.542–3.027)  | 0.57     | 1.129 (0.449–2.842) | 0.8      | 16915675.158 (0–Inf)   | 1        |
| Anticoagulant                             | 0.886 (0.498–1.576) | 0.68     | 0.867 (0.449–1.674) | 0.67     | 0.301 (0.018–5.104)    | 0.41     |
| Antiplatelet                              | 0.645 (0.363–1.145) | 0.14     | 0.709 (0.373–1.347) | 0.29     | 0.453 (0.015–13.426)   | 0.65     |
| Thrombolysis                              | 0.784 (0.436–1.412) | 0.42     | 0.766 (0.368–1.593) | 0.48     | 0.508 (0.051–5.052)    | 0.56     |
| GCS                                       | 0.8 (0.712–0.9)     | 0.0002*  | 0.803 (0.697–0.926) | 0.003*   | 0.698 (0.46–1.058)     | 0.09     |
| Failed swallowing                         | 0.977 (0.62–1.541)  | 0.92     | 0.887 (0.517–1.521) | 0.66     | 2.468 (0.305–20.006)   | 0.4      |
| Urinary incontinence                      | 1.301 (0.825–2.053) | 0.26     | 1.241 (0.731–2.108) | 0.42     | 0.898 (0.111–7.258)    | 0.92     |
| BI (7d)                                   | 0.925 (0.883–0.97)  | 0.001*   | 0.915 (0.866–0.966) | 0.002*   | 0.963 (0.82–1.132)     | 0.65     |
| NIHSS                                     | 1.055 (1.007–1.105) | 0.024*   | 1.043 (0.987–1.102) | 0.14     | 1.204 (1.001–1.448)    | 0.05     |
| <b>Cardio-embolism (CE)</b>               |                     |          |                     |          |                        |          |
| Time (year)                               | 0.972 (0.945–0.998) | 0.034*   | 0.97 (0.943–0.998)  | 0.036*   | 0.946 (0.876–1.022)    | 0.16     |
| Age                                       | 1.058 (1.048–1.068) | <0.0001* | 1.064 (1.051–1.077) | <0.0001* | 1.052 (1.03–1.074)     | <0.0001* |
| Female (vs male)                          | 0.828 (0.679–1.009) | 0.06     | 0.73 (0.579–0.92)   | 0.008*   | 0.928 (0.54–1.596)     | 0.79     |
| Black (vs white)                          | 1.218 (0.777–1.911) | 0.39     |                     |          |                        |          |
| Other (vs white)                          | 1.049 (0.572–1.927) | 0.88     |                     |          |                        |          |
| Current drinker                           | 0.789 (0.644–0.967) | 0.023*   | 0.725 (0.575–0.915) | 0.007*   | 0.686 (0.367–1.28)     | 0.24     |
| Smoker                                    | 1.777 (1.368–2.309) | <0.0001* | 1.723 (1.284–2.314) | 0.0003*  | 2.565 (0.938–7.013)    | 0.07     |
| Hypertension                              | 0.98 (0.798–1.203)  | 0.85     | 1.094 (0.868–1.379) | 0.45     | 0.694 (0.313–1.542)    | 0.37     |
| Diabetes mellitus                         | 1.14 (0.893–1.454)  | 0.29     | 1.154 (0.867–1.536) | 0.33     | 1.128 (0.588–2.165)    | 0.72     |
| Hypercholesterolaemia                     | 0.942 (0.754–1.177) | 0.6      | 0.852 (0.666–1.09)  | 0.2      | 1.881 (0.919–3.85)     | 0.08     |
| Atrial fibrillation                       | 1.217 (1.005–1.473) | 0.044*   | 1.162 (0.94–1.436)  | 0.17     | 1.216 (0.654–2.26)     | 0.54     |
| Myocardial infarction                     | 1.09 (0.855–1.39)   | 0.49     | 1.061 (0.807–1.394) | 0.67     | 1.908 (0.828–4.395)    | 0.13     |
| TIA                                       | 1.095 (0.837–1.433) | 0.51     | 1.064 (0.786–1.439) | 0.69     | 1.199 (0.488–2.946)    | 0.69     |

|                                       |                     |          |                     |          |                      |          |
|---------------------------------------|---------------------|----------|---------------------|----------|----------------------|----------|
| Stroke unit admission (vs none)       | 0.782 (0.493–1.241) | 0.3      | 0.755 (0.45–1.264)  | 0.28     | 3.232 (0.702–14.878) | 0.13     |
| Other medical wards (vs none)         | 1.226 (0.766–1.961) | 0.4      | 1.077 (0.638–1.819) | 0.78     | 3.98 (0.752–21.069)  | 0.1      |
| Anticoagulant                         | 0.908 (0.715–1.154) | 0.43     | 1.034 (0.77–1.39)   | 0.82     | 0.445 (0.195–1.016)  | 0.06     |
| Antiplatelet                          | 0.694 (0.476–1.012) | 0.06     | 0.783 (0.512–1.197) | 0.26     | 0.377 (0.17–0.837)   | 0.017*   |
| Thrombolysis                          | 0.808 (0.573–1.14)  | 0.23     | 0.928 (0.627–1.374) | 0.71     | 0.289 (0.084–0.988)  | 0.049*   |
| GCS                                   | 0.943 (0.906–0.982) | 0.004*   | 0.94 (0.898–0.983)  | 0.007*   | 1.012 (0.895–1.146)  | 0.84     |
| Failed swallowing                     | 1.146 (0.881–1.489) | 0.31     | 1.152 (0.864–1.536) | 0.34     | 1.058 (0.463–2.42)   | 0.89     |
| Urinary incontinence                  | 1.248 (0.952–1.636) | 0.11     | 1.111 (0.807–1.53)  | 0.52     | 1.244 (0.582–2.659)  | 0.57     |
| BI (7d)                               | 0.948 (0.927–0.969) | <0.0001* | 0.95 (0.927–0.974)  | <0.0001* | 0.925 (0.869–0.985)  | 0.015*   |
| NIHSS                                 | 1.036 (1.016–1.056) | 0.0004*  | 1.034 (1.011–1.057) | 0.004*   | 1.056 (1–1.115)      | 0.05*    |
| <b>Small vessel occlusion (SVO)</b>   |                     |          |                     |          |                      |          |
| Time (year)                           | 0.96 (0.917–1.006)  | 0.08     | 0.956 (0.91–1.004)  | 0.07     | 0.944 (0.87–1.025)   | 0.17     |
| Age                                   | 1.065 (1.051–1.079) | <0.0001* | 1.067 (1.051–1.084) | <0.0001* | 1.056 (1.025–1.088)  | 0.0003*  |
| Female (vs male)                      | 0.882 (0.692–1.123) | 0.31     | 0.914 (0.677–1.233) | 0.55     | 0.934 (0.542–1.61)   | 0.81     |
| Black (vs white)                      | 0.697 (0.427–1.137) | 0.15     |                     |          |                      |          |
| Other (vs white)                      | 0.704 (0.328–1.514) | 0.37     |                     |          |                      |          |
| Current drinker                       | 0.809 (0.626–1.045) | 0.1      | 0.797 (0.575–1.105) | 0.17     | 0.961 (0.549–1.68)   | 0.89     |
| Smoker                                | 1.48 (1.116–1.962)  | 0.007*   | 1.365 (0.958–1.946) | 0.09     | 1.622 (0.842–3.123)  | 0.15     |
| Hypertension                          | 0.88 (0.676–1.145)  | 0.34     | 0.925 (0.68–1.259)  | 0.62     | 0.425 (0.216–0.837)  | 0.013*   |
| Diabetes mellitus                     | 1.31 (0.99–1.734)   | 0.06     | 1.019 (0.69–1.506)  | 0.92     | 1.592 (0.886–2.859)  | 0.12     |
| Hypercholesterolaemia                 | 1.129 (0.846–1.506) | 0.41     | 1.005 (0.705–1.434) | 0.98     | 2.117 (1.068–4.194)  | 0.032*   |
| Atrial fibrillation                   | 2.084 (1.264–3.435) | 0.004*   | 2.267 (1.185–4.337) | 0.014*   | 2.941 (1.015–8.524)  | 0.047*   |
| Myocardial infarction                 | 1.587 (1.018–2.475) | 0.042*   | 2.155 (1.217–3.817) | 0.008*   | 1.19 (0.427–3.315)   | 0.74     |
| TIA                                   | 1.073 (0.728–1.582) | 0.72     | 0.902 (0.557–1.46)  | 0.67     | 2.759 (1.183–6.436)  | 0.019*   |
| Stroke unit admission (vs none)       | 1.456 (1.004–2.112) | 0.048*   | 1.296 (0.832–2.02)  | 0.25     | 1.598 (0.653–3.914)  | 0.3      |
| Other medical wards (vs none)         | 1.356 (0.882–2.083) | 0.17     | 1.073 (0.639–1.8)   | 0.79     | 1.312 (0.495–3.477)  | 0.58     |
| Anticoagulant                         | 1.062 (0.654–1.724) | 0.81     | 1.114 (0.622–1.995) | 0.72     | 0.551 (0.152–2.003)  | 0.37     |
| Antiplatelet                          | 0.577 (0.38–0.875)  | 0.011*   | 0.722 (0.433–1.202) | 0.21     | 0.452 (0.132–1.547)  | 0.21     |
| Thrombolysis                          | 0.949 (0.366–2.461) | 0.91     | 0.822 (0.246–2.743) | 0.75     | 0.828 (0.065–10.533) | 0.88     |
| GCS                                   | 0.973 (0.907–1.044) | 0.45     | 0.997 (0.908–1.095) | 0.95     | 0.916 (0.745–1.126)  | 0.4      |
| Failed swallowing                     | 1.544 (1.086–2.194) | 0.016*   | 1.683 (1.112–2.546) | 0.014*   | 1.222 (0.47–3.179)   | 0.68     |
| Urinary incontinence                  | 1.142 (0.835–1.561) | 0.4      | 1.172 (0.806–1.706) | 0.41     | 1.815 (0.782–4.214)  | 0.17     |
| BI (7d)                               | 0.935 (0.91–0.961)  | <0.0001* | 0.938 (0.908–0.969) | 0.0001*  | 0.923 (0.863–0.987)  | 0.02*    |
| NIHSS                                 | 1.018 (0.978–1.06)  | 0.38     | 1.018 (0.97–1.069)  | 0.47     | 1.023 (0.928–1.127)  | 0.65     |
| <b>Undetermined aetiologies (UND)</b> |                     |          |                     |          |                      |          |
| Time (year)                           | 0.985 (0.955–1.016) | 0.34     | 0.991 (0.96–1.024)  | 0.59     | 0.951 (0.897–1.008)  | 0.09     |
| Age                                   | 1.061 (1.052–1.071) | <0.0001* | 1.066 (1.054–1.078) | <0.0001* | 1.063 (1.042–1.085)  | <0.0001* |
| Female (vs male)                      | 0.842 (0.698–1.016) | 0.07     | 0.837 (0.672–1.042) | 0.11     | 0.907 (0.569–1.448)  | 0.68     |
| Black (vs white)                      | 0.939 (0.615–1.435) | 0.77     |                     |          |                      |          |
| Other (vs white)                      | 0.612 (0.325–1.149) | 0.13     |                     |          |                      |          |
| Current drinker                       | 0.92 (0.754–1.122)  | 0.41     | 0.923 (0.739–1.153) | 0.48     | 0.933 (0.547–1.591)  | 0.8      |
| Smoker                                | 1.548 (1.262–1.9)   | <0.0001* | 1.558 (1.224–1.981) | 0.0003*  | 2.121 (1.228–3.663)  | 0.007*   |
| Hypertension                          | 0.941 (0.782–1.132) | 0.52     | 0.925 (0.751–1.139) | 0.46     | 1.111 (0.645–1.915)  | 0.7      |
| Diabetes mellitus                     | 1.176 (0.958–1.444) | 0.12     | 1.345 (1.052–1.719) | 0.018*   | 1.002 (0.624–1.608)  | 0.99     |
| Hypercholesterolaemia                 | 1.024 (0.829–1.266) | 0.82     | 1.051 (0.816–1.354) | 0.7      | 0.673 (0.39–1.161)   | 0.15     |
| Atrial fibrillation                   | 1.204 (0.949–1.528) | 0.13     | 1.072 (0.826–1.392) | 0.6      | 2.429 (1.048–5.626)  | 0.039*   |
| Myocardial infarction                 | 1.061 (0.801–1.406) | 0.68     | 1.158 (0.838–1.599) | 0.37     | 1.061 (0.402–2.798)  | 0.91     |
| TIA                                   | 1.227 (0.949–1.586) | 0.12     | 1.199 (0.905–1.588) | 0.21     | 1.781 (0.697–4.552)  | 0.23     |
| Stroke unit admission (vs none)       | 0.983 (0.682–1.419) | 0.93     | 1.128 (0.727–1.751) | 0.59     | 1.048 (0.411–2.673)  | 0.92     |
| Other medical wards (vs none)         | 1.441 (0.996–2.086) | 0.05     | 1.67 (1.074–2.598)  | 0.023*   | 1.203 (0.397–3.645)  | 0.74     |
| Anticoagulant                         | 0.893 (0.653–1.22)  | 0.48     | 0.858 (0.61–1.206)  | 0.38     | 1.37 (0.584–3.212)   | 0.47     |
| Antiplatelet                          | 0.634 (0.475–0.847) | 0.003*   | 0.616 (0.438–0.867) | 0.007*   | 0.52 (0.225–1.198)   | 0.13     |
| Thrombolysis                          | 0.798 (0.554–1.149) | 0.23     | 0.655 (0.419–1.026) | 0.07     | 1.069 (0.491–2.326)  | 0.87     |
| GCS                                   | 0.895 (0.858–0.934) | <0.0001* | 0.891 (0.843–0.942) | <0.0001* | 0.867 (0.785–0.958)  | 0.006*   |
| Failed swallowing                     | 1.434 (1.148–1.79)  | 0.002*   | 1.475 (1.145–1.901) | 0.003*   | 1.275 (0.659–2.467)  | 0.47     |
| Urinary incontinence                  | 1.253 (0.996–1.575) | 0.05     | 1.093 (0.832–1.435) | 0.52     | 2.293 (1.267–4.149)  | 0.006*   |
| BI (7d)                               | 0.942 (0.925–0.96)  | <0.0001* | 0.936 (0.915–0.957) | <0.0001* | 0.942 (0.902–0.984)  | 0.007*   |
| NIHSS                                 | 1.035 (1.016–1.055) | 0.0005*  | 1.045 (1.02–1.07)   | 0.0005*  | 0.989 (0.939–1.041)  | 0.67     |

**Table A: Survival models for ISs, overall and by ethnic groups.**

\* Denotes significant trends ( $p < 0.05$ ).

Abbreviations: BI, Barthel index; CI, confidence interval; GCS, Glasgow coma scale; NIHSS, National Institutes of Health Stroke Scale; and TIA, transient ischaemic attack.

|                                           | Males               |          | Females              |          |
|-------------------------------------------|---------------------|----------|----------------------|----------|
|                                           | HR (95% CI)         | P Value  | HR (95% CI)          | P Value  |
| <b>All ischaemic strokes (ISs)</b>        |                     |          |                      |          |
| Time (year)                               | 0.975 (0.953–0.998) | 0.034*   | 0.976 (0.956–0.995)  | 0.016*   |
| Age                                       | 1.066 (1.058–1.074) | <0.0001* | 1.061 (1.053–1.069)  | <0.0001* |
| Black (vs white)                          | 0.816 (0.672–0.991) | 0.04*    | 0.835 (0.681–1.023)  | 0.08     |
| Other (vs white)                          | 0.771 (0.579–1.026) | 0.07     | 0.964 (0.728–1.276)  | 0.8      |
| Current drinker                           | 0.855 (0.721–1.015) | 0.07     | 0.822 (0.705–0.96)   | 0.013*   |
| Smoker                                    | 1.536 (1.282–1.841) | <0.0001* | 1.564 (1.279–1.913)  | <0.0001* |
| Hypertension                              | 0.961 (0.814–1.134) | 0.64     | 0.982 (0.838–1.149)  | 0.82     |
| Diabetes mellitus                         | 1.417 (1.183–1.696) | 0.0002*  | 1.154 (0.971–1.371)  | 0.1      |
| Hypercholesterolaemia                     | 0.978 (0.813–1.176) | 0.81     | 0.922 (0.776–1.094)  | 0.35     |
| Atrial fibrillation                       | 1.362 (1.11–1.671)  | 0.003*   | 1.375 (1.169–1.618)  | 0.0001*  |
| Myocardial infarction                     | 1.047 (0.837–1.31)  | 0.69     | 1.468 (1.172–1.839)  | 0.0008*  |
| TIA                                       | 1.005 (0.793–1.274) | 0.97     | 1.151 (0.94–1.409)   | 0.17     |
| Stroke unit admission (vs none)           | 1.204 (0.897–1.615) | 0.22     | 0.956 (0.712–1.283)  | 0.76     |
| Other medical wards (vs none)             | 1.775 (1.298–2.427) | 0.0003*  | 1.204 (0.892–1.626)  | 0.23     |
| Anticoagulant                             | 0.909 (0.702–1.178) | 0.47     | 1.014 (0.804–1.277)  | 0.91     |
| Antiplatelet                              | 0.628 (0.476–0.828) | 0.002*   | 0.684 (0.537–0.87)   | 0.003*   |
| Thrombolysis                              | 0.864 (0.634–1.178) | 0.36     | 0.794 (0.602–1.048)  | 0.11     |
| GCS                                       | 0.942 (0.91–0.975)  | 0.0007*  | 0.903 (0.875–0.933)  | <0.0001* |
| Failed swallowing                         | 1.41 (1.14–1.745)   | 0.002*   | 1.267 (1.049–1.53)   | 0.014*   |
| Urinary incontinence                      | 1.24 (1.006–1.529)  | 0.044*   | 1.137 (0.933–1.384)  | 0.2      |
| BI (7d)                                   | 0.955 (0.938–0.972) | <0.0001* | 0.931 (0.915–0.946)  | <0.0001* |
| NIHSS                                     | 1.041 (1.023–1.059) | <0.0001* | 1.034 (1.018–1.051)  | <0.0001* |
| <b>Large artery atherosclerosis (LAA)</b> |                     |          |                      |          |
| Time (year)                               | 0.999 (0.922–1.084) | 0.99     | 0.972 (0.897–1.053)  | 0.48     |
| Age                                       | 1.08 (1.05–1.111)   | <0.0001* | 1.086 (1.059–1.114)  | <0.0001* |
| Black (vs white)                          | 0.684 (0.334–1.403) | 0.3      | 0.607 (0.312–1.178)  | 0.14     |
| Other (vs white)                          | 0.676 (0.266–1.717) | 0.41     | 0.993 (0.316–3.121)  | 0.99     |
| Current drinker                           | 0.827 (0.473–1.448) | 0.51     | 0.887 (0.505–1.559)  | 0.68     |
| Smoker                                    | 1.888 (0.968–3.681) | 0.06     | 1.553 (0.819–2.944)  | 0.18     |
| Hypertension                              | 1.442 (0.808–2.573) | 0.22     | 1.04 (0.554–1.95)    | 0.9      |
| Diabetes mellitus                         | 2.009 (1.074–3.757) | 0.029*   | 1.738 (0.849–3.558)  | 0.13     |
| Hypercholesterolaemia                     | 0.775 (0.399–1.506) | 0.45     | 0.457 (0.231–0.906)  | 0.025*   |
| Atrial fibrillation                       | 1.169 (0.269–5.083) | 0.83     | 4.123 (1.343–12.657) | 0.013*   |
| Myocardial infarction                     | 1.719 (0.806–3.666) | 0.16     | 2.084 (0.807–5.386)  | 0.13     |
| TIA                                       | 0.93 (0.459–1.885)  | 0.84     | 1.531 (0.773–3.031)  | 0.22     |
| Stroke unit admission (vs none)           | 1.429 (0.457–4.466) | 0.54     | 1.068 (0.297–3.845)  | 0.92     |
| Other medical wards (vs none)             | 1.327 (0.338–5.206) | 0.68     | 1.281 (0.334–4.907)  | 0.72     |
| Anticoagulant                             | 0.724 (0.294–1.784) | 0.48     | 1.157 (0.421–3.176)  | 0.78     |
| Antiplatelet                              | 0.423 (0.186–0.961) | 0.042*   | 1.097 (0.39–3.09)    | 0.86     |
| Thrombolysis                              | 0.919 (0.392–2.155) | 0.85     | 0.759 (0.312–1.848)  | 0.54     |
| GCS                                       | 0.77 (0.625–0.949)  | 0.015*   | 0.771 (0.653–0.91)   | 0.002*   |
| Failed swallowing                         | 0.989 (0.467–2.095) | 0.98     | 0.929 (0.499–1.732)  | 0.82     |
| Urinary incontinence                      | 0.998 (0.493–2.019) | 0.99     | 1.408 (0.7–2.832)    | 0.34     |
| BI (7d)                                   | 0.903 (0.839–0.971) | 0.007*   | 0.929 (0.869–0.994)  | 0.032*   |
| NIHSS                                     | 1.074 (1–1.153)     | 0.05     | 1.045 (0.978–1.117)  | 0.2      |
| <b>Cardio-embolism (CE)</b>               |                     |          |                      |          |
| Time (year)                               | 0.962 (0.922–1.003) | 0.07     | 0.969 (0.939–1)      | 0.048*   |
| Age                                       | 1.064 (1.049–1.079) | <0.0001* | 1.057 (1.043–1.071)  | <0.0001* |
| Black (vs white)                          | 1.049 (0.7–1.571)   | 0.82     | 1.26 (0.851–1.868)   | 0.25     |
| Other (vs white)                          | 0.65 (0.35–1.205)   | 0.17     | 1.192 (0.765–1.855)  | 0.44     |
| Current drinker                           | 0.764 (0.536–1.09)  | 0.14     | 0.785 (0.603–1.022)  | 0.07     |
| Smoker                                    | 1.772 (1.235–2.543) | 0.002*   | 1.946 (1.225–3.091)  | 0.006*   |
| Hypertension                              | 1.065 (0.761–1.489) | 0.71     | 0.981 (0.749–1.285)  | 0.89     |
| Diabetes mellitus                         | 1.184 (0.821–1.706) | 0.37     | 1.134 (0.815–1.579)  | 0.46     |
| Hypercholesterolaemia                     | 0.962 (0.668–1.386) | 0.84     | 0.947 (0.708–1.267)  | 0.71     |
| Atrial fibrillation                       | 1.106 (0.804–1.521) | 0.54     | 1.283 (1.006–1.637)  | 0.045*   |
| Myocardial infarction                     | 0.886 (0.618–1.269) | 0.51     | 1.308 (0.929–1.842)  | 0.12     |
| TIA                                       | 1.031 (0.61–1.744)  | 0.91     | 1.096 (0.784–1.533)  | 0.59     |
| Stroke unit admission (vs none)           | 0.84 (0.419–1.682)  | 0.62     | 0.741 (0.387–1.42)   | 0.37     |
| Other medical wards (vs none)             | 1.603 (0.791–3.247) | 0.19     | 1.03 (0.529–2.007)   | 0.93     |

|                                       |                     |          |                     |          |
|---------------------------------------|---------------------|----------|---------------------|----------|
| Anticoagulant                         | 0.842 (0.563–1.259) | 0.4      | 0.982 (0.706–1.366) | 0.91     |
| Antiplatelet                          | 0.62 (0.349–1.102)  | 0.11     | 0.767 (0.479–1.228) | 0.27     |
| Thrombolysis                          | 0.765 (0.424–1.381) | 0.38     | 0.854 (0.555–1.314) | 0.47     |
| GCS                                   | 0.923 (0.858–0.992) | 0.03*    | 0.94 (0.895–0.987)  | 0.013*   |
| Failed swallowing                     | 1.141 (0.749–1.738) | 0.54     | 1.13 (0.808–1.581)  | 0.48     |
| Urinary incontinence                  | 1.428 (0.935–2.181) | 0.1      | 1.067 (0.75–1.519)  | 0.72     |
| BI (7d)                               | 0.965 (0.931–1.001) | 0.06     | 0.933 (0.907–0.96)  | <0.0001* |
| NIHSS                                 | 1.049 (1.019–1.08)  | 0.001*   | 1.03 (1.003–1.056)  | 0.027*   |
| <b>Small vessel occlusion (SVO)</b>   |                     |          |                     |          |
| Time (year)                           | 0.97 (0.917–1.027)  | 0.3      | 0.942 (0.888–0.999) | 0.047*   |
| Age                                   | 1.07 (1.052–1.089)  | <0.0001* | 1.057 (1.036–1.08)  | <0.0001* |
| Black (vs white)                      | 0.76 (0.513–1.126)  | 0.17     | 0.562 (0.342–0.923) | 0.023*   |
| Other (vs white)                      | 1.141 (0.65–2.004)  | 0.65     | 0.448 (0.194–1.036) | 0.06     |
| Current drinker                       | 1.035 (0.703–1.524) | 0.86     | 0.594 (0.398–0.887) | 0.011*   |
| Smoker                                | 1.493 (1.004–2.219) | 0.048*   | 1.343 (0.852–2.119) | 0.2      |
| Hypertension                          | 0.902 (0.62–1.313)  | 0.59     | 0.983 (0.651–1.484) | 0.94     |
| Diabetes mellitus                     | 1.523 (1.028–2.257) | 0.036*   | 0.945 (0.594–1.502) | 0.81     |
| Hypercholesterolaemia                 | 1.033 (0.688–1.551) | 0.88     | 1.308 (0.85–2.013)  | 0.22     |
| Atrial fibrillation                   | 1.582 (0.671–3.725) | 0.29     | 2.221 (1.192–4.138) | 0.012*   |
| Myocardial infarction                 | 1.332 (0.717–2.476) | 0.36     | 2.775 (1.389–5.546) | 0.004*   |
| TIA                                   | 1.189 (0.725–1.95)  | 0.49     | 0.784 (0.389–1.577) | 0.49     |
| Stroke unit admission (vs none)       | 1.574 (0.911–2.72)  | 0.1      | 1.369 (0.801–2.339) | 0.25     |
| Other medical wards (vs none)         | 1.858 (0.993–3.475) | 0.05     | 1.063 (0.577–1.961) | 0.84     |
| Anticoagulant                         | 0.951 (0.459–1.973) | 0.89     | 1.067 (0.56–2.035)  | 0.84     |
| Antiplatelet                          | 0.454 (0.245–0.84)  | 0.014*   | 0.669 (0.367–1.217) | 0.19     |
| Thrombolysis                          | 1.381 (0.317–6.016) | 0.67     | 0.687 (0.19–2.486)  | 0.57     |
| GCS                                   | 1.03 (0.931–1.14)   | 0.57     | 0.869 (0.752–1.004) | 0.06     |
| Failed swallowing                     | 1.557 (0.898–2.701) | 0.12     | 1.678 (1–2.818)     | 0.05     |
| Urinary incontinence                  | 1.145 (0.702–1.868) | 0.59     | 1.095 (0.683–1.757) | 0.71     |
| BI (7d)                               | 0.935 (0.9–0.971)   | 0.0006*  | 0.927 (0.891–0.964) | 0.0002*  |
| NIHSS                                 | 1.014 (0.959–1.072) | 0.63     | 1.007 (0.944–1.074) | 0.83     |
| <b>Undetermined aetiologies (UND)</b> |                     |          |                     |          |
| Time (year)                           | 0.97 (0.931–1.01)   | 0.14     | 0.99 (0.955–1.026)  | 0.58     |
| Age                                   | 1.071 (1.057–1.085) | <0.0001* | 1.056 (1.042–1.069) | <0.0001* |
| Black (vs white)                      | 0.79 (0.566–1.103)  | 0.17     | 0.839 (0.599–1.175) | 0.31     |
| Other (vs white)                      | 0.723 (0.45–1.162)  | 0.18     | 0.909 (0.541–1.526) | 0.72     |
| Current drinker                       | 0.824 (0.622–1.091) | 0.18     | 0.955 (0.728–1.254) | 0.74     |
| Smoker                                | 1.513 (1.129–2.029) | 0.006*   | 1.574 (1.172–2.114) | 0.003*   |
| Hypertension                          | 0.906 (0.678–1.21)  | 0.5      | 0.98 (0.761–1.264)  | 0.88     |
| Diabetes mellitus                     | 1.421 (1.047–1.927) | 0.024*   | 1.027 (0.769–1.37)  | 0.86     |
| Hypercholesterolaemia                 | 1.202 (0.87–1.661)  | 0.26     | 0.891 (0.666–1.193) | 0.44     |
| Atrial fibrillation                   | 1.261 (0.873–1.821) | 0.22     | 1.144 (0.813–1.609) | 0.44     |
| Myocardial infarction                 | 0.765 (0.501–1.169) | 0.22     | 1.563 (1.046–2.336) | 0.029*   |
| TIA                                   | 0.92 (0.605–1.396)  | 0.69     | 1.519 (1.083–2.13)  | 0.015*   |
| Stroke unit admission (vs none)       | 1.233 (0.72–2.113)  | 0.45     | 0.812 (0.477–1.383) | 0.44     |
| Other medical wards (vs none)         | 1.993 (1.13–3.516)  | 0.017*   | 1.171 (0.707–1.939) | 0.54     |
| Anticoagulant                         | 0.896 (0.536–1.499) | 0.68     | 0.895 (0.592–1.352) | 0.6      |
| Antiplatelet                          | 0.675 (0.458–0.995) | 0.049*   | 0.558 (0.359–0.868) | 0.012*   |
| Thrombolysis                          | 0.862 (0.505–1.471) | 0.59     | 0.748 (0.466–1.199) | 0.23     |
| GCS                                   | 0.916 (0.862–0.973) | 0.005*   | 0.864 (0.811–0.92)  | <0.0001* |
| Failed swallowing                     | 1.613 (1.167–2.231) | 0.004*   | 1.379 (0.991–1.919) | 0.06     |
| Urinary incontinence                  | 1.379 (0.97–1.961)  | 0.07     | 1.132 (0.821–1.563) | 0.45     |
| BI (7d)                               | 0.959 (0.931–0.987) | 0.005*   | 0.929 (0.904–0.954) | <0.0001* |
| NIHSS                                 | 1.031 (1.003–1.059) | 0.031*   | 1.039 (1.012–1.067) | 0.005*   |

**Table B: Survival models for ISs by sex groups.**

\* Denotes significant trends ( $p < 0.05$ ).

Abbreviations: BI, Barthel index; CI, confidence interval; GCS, Glasgow coma scale; NIHSS, National Institutes of Health Stroke Scale; and TIA, transient ischaemic attack.



|                                           | Aged <65 years         |          | Aged 65+            |          |
|-------------------------------------------|------------------------|----------|---------------------|----------|
|                                           | HR (95% CI)            | P Value  | HR (95% CI)         | P Value  |
| <b>All ischaemic strokes (ISs)</b>        |                        |          |                     |          |
| Time (year)                               | 0.985 (0.944–1.028)    | 0.49     | 0.975 (0.959–0.992) | 0.003*   |
| Age                                       | 1.052 (1.031–1.073)    | <0.0001* | 1.061 (1.053–1.069) | <0.0001* |
| Female (vs male)                          | 0.811 (0.6–1.097)      | 0.17     | 0.865 (0.77–0.972)  | 0.015*   |
| Black (vs white)                          | 0.872 (0.618–1.229)    | 0.43     | 0.811 (0.694–0.946) | 0.008*   |
| Other (vs white)                          | 0.889 (0.558–1.416)    | 0.62     | 0.806 (0.647–1.006) | 0.06     |
| Current drinker                           | 0.737 (0.541–1.003)    | 0.05     | 0.857 (0.761–0.965) | 0.011*   |
| Smoker                                    | 1.816 (1.32–2.499)     | 0.0003*  | 1.522 (1.318–1.757) | <0.0001* |
| Hypertension                              | 1.134 (0.826–1.557)    | 0.44     | 0.936 (0.826–1.059) | 0.29     |
| Diabetes mellitus                         | 1.791 (1.284–2.499)    | 0.0006*  | 1.201 (1.049–1.376) | 0.008*   |
| Hypercholesterolaemia                     | 0.899 (0.643–1.258)    | 0.54     | 0.94 (0.821–1.077)  | 0.37     |
| Atrial fibrillation                       | 0.997 (0.616–1.613)    | 0.99     | 1.425 (1.242–1.635) | <0.0001* |
| Myocardial infarction                     | 1.168 (0.726–1.878)    | 0.52     | 1.248 (1.055–1.475) | 0.01*    |
| TIA                                       | 0.837 (0.509–1.375)    | 0.48     | 1.14 (0.973–1.337)  | 0.11     |
| Stroke unit admission (vs none)           | 1.112 (0.645–1.917)    | 0.7      | 1.056 (0.844–1.321) | 0.63     |
| Other medical wards (vs none)             | 1.747 (0.983–3.103)    | 0.06     | 1.377 (1.087–1.743) | 0.008*   |
| Anticoagulant                             | 0.91 (0.579–1.431)     | 0.69     | 0.975 (0.802–1.184) | 0.8      |
| Antiplatelet                              | 0.568 (0.371–0.87)     | 0.011*   | 0.669 (0.542–0.826) | 0.0004*  |
| Thrombolysis                              | 0.819 (0.474–1.414)    | 0.47     | 0.808 (0.641–1.018) | 0.07     |
| GCS                                       | 0.915 (0.856–0.978)    | 0.009*   | 0.921 (0.898–0.944) | <0.0001* |
| Failed swallowing                         | 1.411 (0.946–2.104)    | 0.09     | 1.31 (1.129–1.52)   | 0.0004*  |
| Urinary incontinence                      | 1.078 (0.708–1.643)    | 0.73     | 1.223 (1.053–1.419) | 0.008*   |
| BI (7d)                                   | 0.938 (0.91–0.966)     | <0.0001* | 0.942 (0.93–0.955)  | <0.0001* |
| NIHSS                                     | 1.053 (1.019–1.088)    | 0.002*   | 1.036 (1.023–1.049) | <0.0001* |
| <b>Large artery atherosclerosis (LAA)</b> |                        |          |                     |          |
| Time (year)                               | 1.005 (0.842–1.199)    | 0.96     | 0.982 (0.924–1.042) | 0.54     |
| Age                                       | 1.128 (1.015–1.253)    | 0.025*   | 1.066 (1.037–1.096) | <0.0001* |
| Female (vs male)                          | 0.391 (0.094–1.623)    | 0.2      | 1.143 (0.77–1.697)  | 0.51     |
| Black (vs white)                          | 0.715 (0.166–3.084)    | 0.65     | 0.684 (0.41–1.14)   | 0.14     |
| Other (vs white)                          | 0.532 (0.064–4.393)    | 0.56     | 0.802 (0.379–1.696) | 0.56     |
| Current drinker                           | 0.384 (0.108–1.37)     | 0.14     | 0.943 (0.627–1.418) | 0.78     |
| Smoker                                    | 5.744 (0.997–33.085)   | 0.05     | 1.34 (0.837–2.144)  | 0.22     |
| Hypertension                              | 2.29 (0.502–10.449)    | 0.28     | 1.161 (0.77–1.75)   | 0.48     |
| Diabetes mellitus                         | 3.415 (0.654–17.85)    | 0.15     | 1.843 (1.151–2.953) | 0.011*   |
| Hypercholesterolaemia                     | 0.905 (0.171–4.786)    | 0.91     | 0.546 (0.33–0.903)  | 0.018*   |
| Atrial fibrillation                       | 7.032 (0.4–123.771)    | 0.18     | 1.723 (0.68–4.362)  | 0.25     |
| Myocardial infarction                     | 0.596 (0.069–5.152)    | 0.64     | 1.911 (1.042–3.505) | 0.036*   |
| TIA                                       | 0.6 (0.134–2.691)      | 0.51     | 1.451 (0.873–2.412) | 0.15     |
| Stroke unit admission (vs none)           | 3.682 (0.224–60.584)   | 0.36     | 1.212 (0.519–2.831) | 0.66     |
| Other medical wards (vs none)             | 19.981 (0.759–525.746) | 0.07     | 1.203 (0.473–3.064) | 0.7      |
| Anticoagulant                             | 1.11 (0.116–10.631)    | 0.93     | 0.905 (0.475–1.725) | 0.76     |
| Antiplatelet                              | 0.402 (0.052–3.082)    | 0.38     | 0.66 (0.347–1.255)  | 0.21     |
| Thrombolysis                              | 0.531 (0.05–5.588)     | 0.6      | 0.855 (0.442–1.654) | 0.64     |
| GCS                                       | 0.597 (0.384–0.929)    | 0.023*   | 0.8 (0.702–0.911)   | 0.001*   |
| Failed swallowing                         | 1.882 (0.348–10.178)   | 0.46     | 1.012 (0.611–1.677) | 0.96     |
| Urinary incontinence                      | 0.16 (0.022–1.174)     | 0.07     | 1.419 (0.867–2.324) | 0.16     |
| BI (7d)                                   | 0.872 (0.753–1.01)     | 0.07     | 0.939 (0.888–0.992) | 0.027*   |
| NIHSS                                     | 1.061 (0.874–1.29)     | 0.55     | 1.055 (1.002–1.11)  | 0.041*   |
| <b>Cardio-embolism (CE)</b>               |                        |          |                     |          |
| Time (year)                               | 0.958 (0.882–1.041)    | 0.31     | 0.969 (0.944–0.995) | 0.022*   |
| Age                                       | 1.075 (1.027–1.125)    | 0.002*   | 1.046 (1.031–1.061) | <0.0001* |
| Female (vs male)                          | 0.872 (0.389–1.958)    | 0.74     | 0.802 (0.651–0.988) | 0.038*   |
| Black (vs white)                          | 3.432 (1.38–8.538)     | 0.008*   | 0.974 (0.719–1.319) | 0.86     |
| Other (vs white)                          | 1.276 (0.44–3.698)     | 0.65     | 0.795 (0.538–1.174) | 0.25     |
| Current drinker                           | 0.651 (0.304–1.393)    | 0.27     | 0.82 (0.662–1.014)  | 0.07     |
| Smoker                                    | 1.966 (0.927–4.169)    | 0.08     | 1.853 (1.359–2.527) | 0.0001*  |
| Hypertension                              | 0.758 (0.345–1.662)    | 0.49     | 1.01 (0.81–1.259)   | 0.93     |
| Diabetes mellitus                         | 1.278 (0.526–3.105)    | 0.59     | 1.114 (0.86–1.441)  | 0.41     |
| Hypercholesterolaemia                     | 1.458 (0.628–3.385)    | 0.38     | 0.896 (0.703–1.14)  | 0.37     |
| Atrial fibrillation                       | 0.977 (0.433–2.202)    | 0.96     | 1.259 (1.029–1.539) | 0.025*   |
| Myocardial infarction                     | 0.977 (0.415–2.302)    | 0.96     | 1.126 (0.868–1.461) | 0.37     |
| TIA                                       | 1.195 (0.385–3.714)    | 0.76     | 1.084 (0.817–1.438) | 0.58     |
| Stroke unit admission (vs none)           | 1.354 (0.12–15.286)    | 0.81     | 0.74 (0.459–1.191)  | 0.21     |
| Other medical wards (vs none)             | 4.033 (0.377–43.142)   | 0.25     | 1.097 (0.668–1.802) | 0.71     |
| Anticoagulant                             | 0.589 (0.237–1.466)    | 0.26     | 0.984 (0.745–1.298) | 0.91     |

|                                       |                     |        |                     |          |
|---------------------------------------|---------------------|--------|---------------------|----------|
| Antiplatelet                          | 0.528 (0.184–1.518) | 0.24   | 0.701 (0.475–1.034) | 0.08     |
| Thrombolysis                          | 0.879 (0.284–2.721) | 0.82   | 0.792 (0.557–1.125) | 0.19     |
| GCS                                   | 1.092 (0.946–1.26)  | 0.23   | 0.916 (0.878–0.957) | <0.0001* |
| Failed swallowing                     | 1.83 (0.684–4.898)  | 0.23   | 1.087 (0.825–1.433) | 0.55     |
| Urinary incontinence                  | 0.776 (0.299–2.012) | 0.6    | 1.342 (1.004–1.794) | 0.047*   |
| BI (7d)                               | 0.927 (0.852–1.008) | 0.08   | 0.941 (0.919–0.964) | <0.0001* |
| NIHSS                                 | 1.083 (1.01–1.162)  | 0.026* | 1.031 (1.01–1.053)  | 0.004*   |
| <b>Small vessel occlusion (SVO)</b>   |                     |        |                     |          |
| Time (year)                           | 0.896 (0.794–1.011) | 0.07   | 0.976 (0.936–1.018) | 0.26     |
| Age                                   | 1.012 (0.958–1.07)  | 0.66   | 1.063 (1.043–1.083) | <0.0001* |
| Female (vs male)                      | 0.742 (0.351–1.571) | 0.44   | 0.881 (0.678–1.144) | 0.34     |
| Black (vs white)                      | 1.058 (0.458–2.443) | 0.9    | 0.667 (0.48–0.927)  | 0.016*   |
| Other (vs white)                      | 2.156 (0.8–5.813)   | 0.13   | 0.817 (0.492–1.357) | 0.44     |
| Current drinker                       | 0.726 (0.316–1.666) | 0.45   | 0.844 (0.64–1.113)  | 0.23     |
| Smoker                                | 4.09 (1.77–9.448)   | 0.001* | 1.292 (0.941–1.773) | 0.11     |
| Hypertension                          | 1.01 (0.439–2.323)  | 0.98   | 0.825 (0.619–1.101) | 0.19     |
| Diabetes mellitus                     | 1.16 (0.466–2.89)   | 0.75   | 1.252 (0.922–1.699) | 0.15     |
| Hypercholesterolaemia                 | 2.605 (1.087–6.245) | 0.032* | 1.043 (0.755–1.44)  | 0.8      |
| Atrial fibrillation                   | 0 (0–Inf)           | 1      | 2.128 (1.266–3.578) | 0.005*   |
| Myocardial infarction                 | 2.66 (0.484–14.621) | 0.26   | 1.655 (1.035–2.647) | 0.035*   |
| TIA                                   | 0.307 (0.063–1.487) | 0.14   | 1.248 (0.829–1.878) | 0.29     |
| Stroke unit admission (vs none)       | 2.731 (0.851–8.767) | 0.09   | 1.302 (0.863–1.965) | 0.21     |
| Other medical wards (vs none)         | 0.627 (0.128–3.065) | 0.56   | 1.406 (0.882–2.243) | 0.15     |
| Anticoagulant                         | 1.107 (0.143–8.595) | 0.92   | 1.07 (0.609–1.879)  | 0.81     |
| Antiplatelet                          | 0.492 (0.142–1.709) | 0.27   | 0.581 (0.366–0.923) | 0.024*   |
| Thrombolysis                          | 0.83 (0.081–8.48)   | 0.88   | 0.992 (0.335–2.937) | 0.99     |
| GCS                                   | 0.943 (0.592–1.502) | 0.8    | 0.981 (0.911–1.057) | 0.61     |
| Failed swallowing                     | 2.002 (0.451–8.877) | 0.36   | 1.601 (1.101–2.327) | 0.014*   |
| Urinary incontinence                  | 2.365 (0.65–8.612)  | 0.19   | 1.061 (0.764–1.473) | 0.72     |
| BI (7d)                               | 0.862 (0.79–0.942)  | 0.001* | 0.942 (0.915–0.971) | 0.0001*  |
| NIHSS                                 | 0.931 (0.801–1.083) | 0.36   | 1.03 (0.986–1.076)  | 0.19     |
| <b>Undetermined aetiologies (UND)</b> |                     |        |                     |          |
| Time (year)                           | 0.999 (0.92–1.084)  | 0.98   | 0.981 (0.954–1.009) | 0.19     |
| Age                                   | 1.031 (0.996–1.067) | 0.08   | 1.068 (1.054–1.083) | <0.0001* |
| Female (vs male)                      | 1.498 (0.909–2.466) | 0.11   | 0.785 (0.638–0.966) | 0.023*   |
| Black (vs white)                      | 0.494 (0.263–0.93)  | 0.029* | 0.835 (0.645–1.081) | 0.17     |
| Other (vs white)                      | 0.608 (0.28–1.323)  | 0.21   | 0.847 (0.573–1.251) | 0.4      |
| Current drinker                       | 0.815 (0.478–1.39)  | 0.45   | 0.904 (0.727–1.124) | 0.37     |
| Smoker                                | 1.821 (1.067–3.109) | 0.028* | 1.62 (1.287–2.041)  | <0.0001* |
| Hypertension                          | 1.923 (1.125–3.286) | 0.017* | 0.841 (0.687–1.029) | 0.09     |
| Diabetes mellitus                     | 1.998 (1.127–3.544) | 0.018* | 1.109 (0.881–1.396) | 0.38     |
| Hypercholesterolaemia                 | 0.8 (0.438–1.463)   | 0.47   | 1.06 (0.835–1.346)  | 0.63     |
| Atrial fibrillation                   | 1.085 (0.496–2.378) | 0.84   | 1.259 (0.974–1.627) | 0.08     |
| Myocardial infarction                 | 1.656 (0.578–4.747) | 0.35   | 1.033 (0.767–1.393) | 0.83     |
| TIA                                   | 0.928 (0.37–2.329)  | 0.87   | 1.254 (0.952–1.652) | 0.11     |
| Stroke unit admission (vs none)       | 1.126 (0.428–2.968) | 0.81   | 1.041 (0.693–1.563) | 0.85     |
| Other medical wards (vs none)         | 1.424 (0.551–3.682) | 0.47   | 1.511 (0.999–2.285) | 0.05     |
| Anticoagulant                         | 0.644 (0.275–1.511) | 0.31   | 0.909 (0.647–1.277) | 0.58     |
| Antiplatelet                          | 0.409 (0.195–0.859) | 0.02*  | 0.654 (0.467–0.916) | 0.016*   |
| Thrombolysis                          | 0.755 (0.326–1.748) | 0.51   | 0.777 (0.519–1.163) | 0.22     |
| GCS                                   | 0.873 (0.798–0.956) | 0.003* | 0.893 (0.852–0.937) | <0.0001* |
| Failed swallowing                     | 1.094 (0.567–2.109) | 0.79   | 1.433 (1.119–1.836) | 0.005*   |
| Urinary incontinence                  | 1.696 (0.854–3.367) | 0.13   | 1.215 (0.948–1.556) | 0.12     |
| BI (7d)                               | 0.939 (0.892–0.988) | 0.015* | 0.943 (0.924–0.962) | <0.0001* |
| NIHSS                                 | 1.063 (1.014–1.114) | 0.012* | 1.035 (1.013–1.058) | 0.002*   |

**Table C: Survival models for ISs by age groups.**

\* Denotes significant trends ( $p < 0.05$ ).

Abbreviations: BI, Barthel index; CI, confidence interval; GCS, Glasgow coma scale; NIHSS, National Institutes of Health Stroke Scale; and TIA, transient ischaemic attack.

|                                     | Year Group           |                       |                      |                      | P Value for Trend |
|-------------------------------------|----------------------|-----------------------|----------------------|----------------------|-------------------|
|                                     | 2000–2003<br>(N=807) | 2004–2007<br>(N=1117) | 2008–2011<br>(N=637) | 2012–2015<br>(N=567) |                   |
| <b>Medication use before stroke</b> |                      |                       |                      |                      |                   |
| Antihypertensive                    | 371 (47.6)           | 590 (53.4)            | 207 (33.9)           | 205 (37.0)           | <0.001*           |
| Anti-diabetic                       | 154 (19.2)           | 252 (22.6)            | 122 (19.4)           | 117 (21.0)           | 0.235             |
| Cholesterol-lowering                | 91 (13.8)            | 298 (26.9)            | 235 (38.5)           | 212 (38.2)           | <0.001*           |
| Antiplatelet                        | 256 (42.4)           | 426 (45.1)            | 228 (37.5)           | 169 (30.6)           | <0.001*           |
| Anticoagulant                       | 30 (5.0)             | 43 (3.9)              | 27 (4.4)             | 38 (6.9)             | 0.06              |
| <b>Medications at discharge</b>     |                      |                       |                      |                      |                   |
| Antihypertensive                    | 1.46 (0.50)          | 1.31 (0.46)           | 1.35 (0.48)          | 1.44 (0.50)          | <0.001*           |
| Anti-diabetic                       | 1.22 (0.42)          | 1.17 (0.38)           | 1.19 (0.39)          | 1.19 (0.39)          | 0.791             |
| Antiplatelet                        | 1.12 (0.33)          | 1.09 (0.28)           | 1.75 (0.43)          | 1.78 (0.41)          | <0.001*           |

**Table D: Trends in medication use among patients with IS.**

Data are counts (percentages). P-values were obtained from the Cochran–Armitage tests for trends.

\* Denotes significant trends ( $p < 0.05$ ).

|                                     | Ischaemic Stroke Subtype |               |                |                 |               | P Value  |
|-------------------------------------|--------------------------|---------------|----------------|-----------------|---------------|----------|
|                                     | LAA<br>(N=351)           | CE<br>(N=815) | SVO<br>(N=791) | UND<br>(N=1089) | OTH<br>(N=82) |          |
| <b>Medication use before stroke</b> |                          |               |                |                 |               |          |
| Antihypertensive                    | 159 (46.0)               | 376 (47.7)    | 349 (45.1)     | 466 (44.0)      | 23 (28.4)     | <0.0001* |
| Anti-diabetic                       | 75 (21.5)                | 145 (18.0)    | 171 (21.7)     | 245 (22.7)      | 9 (11.1)      | 0.81     |
| Cholesterol-lowering                | 107 (32.5)               | 231 (30.4)    | 200 (27.0)     | 288 (28.0)      | 10 (13.2)     | <0.0001* |
| Antiplatelet                        | 124 (39.9)               | 337 (47.2)    | 253 (37.9)     | 349 (36.4)      | 16 (27.6)     | 0.1      |
| Anticoagulant                       | 5 (1.6)                  | 74 (9.9)      | 15 (2.1)       | 38 (3.8)        | 6 (8.2)       | <0.0001* |
| <b>Medications at discharge</b>     |                          |               |                |                 |               |          |
| Antihypertensive                    | 1.40 (0.49)              | 1.29 (0.46)   | 1.42 (0.49)    | 1.34 (0.47)     | 1.26 (0.44)   |          |
| Anti-diabetic                       | 1.19 (0.40)              | 1.13 (0.34)   | 1.21 (0.41)    | 1.20 (0.40)     | 1.08 (0.28)   |          |
| Antiplatelet                        | 1.59 (0.49)              | 1.54 (0.50)   | 1.63 (0.48)    | 1.57 (0.50)     | 1.43 (0.50)   | <0.0001* |

**Table E: Medication use among patients with ISs by aetiological subtypes.**

Data are counts (percentages).

\* Denotes significant trends ( $p < 0.05$ ).

| Characteristic        | BI at 3 months        |                    | P Value |
|-----------------------|-----------------------|--------------------|---------|
|                       | Completed<br>(N=1766) | Missing<br>(N=827) |         |
| Age (mean (SD))       | 69.65 (14.00)         | 67.89 (15.17)      | 0.002*  |
| Female                | 846 (47.9)            | 381 (46.1)         | 0.37    |
| Ethnic group          |                       |                    | 0.16    |
| White                 | 1143 (64.7)           | 518 (62.6)         |         |
| Black                 | 491 (27.8)            | 230 (27.8)         |         |
| Other/Unknown         | 134 (7.6)             | 80 (9.7)           |         |
| Current drinker       | 934 (52.9)            | 436 (52.7)         | 0.95    |
| Smoker                | 498 (28.2)            | 249 (30.1)         | 0.31    |
| Hypertension          | 1173 (66.4)           | 552 (66.7)         | 0.93    |
| Diabetes mellitus     | 427 (24.2)            | 182 (22)           | 0.21    |
| Hypercholesterolaemia | 547 (31)              | 236 (28.5)         | 0.18    |
| Atrial fibrillation   | 263 (14.9)            | 126 (15.2)         | 0.86    |
| Myocardial infarction | 152 (8.6)             | 79 (9.6)           | 0.49    |
| TIA                   | 192 (10.9)            | 86 (10.4)          | 0.73    |
| Antihypertensive      | 804 (45.5)            | 359 (43.4)         | 0.32    |
| Anti-diabetic         | 394 (22.3)            | 168 (20.3)         | 0.25    |
| Antiplatelet          | 685 (38.8)            | 330 (39.9)         | 0.62    |
| Anticoagulant         | 72 (4.1)              | 37 (4.5)           | 0.76    |
| Cholesterol-lowering  | 535 (30.3)            | 231 (27.9)         | 0.22    |
| Urinary incontinence  | 493 (27.9)            | 212 (25.6)         | 0.21    |
| Swallow test (fail)   | 367 (20.8)            | 177 (21.4)         | 0.78    |
| GCS <13               | 212 (12)              | 106 (12.8)         | 0.62    |
| BI <15 (7d)           | 775 (43.9)            | 312 (37.7)         | 0.003*  |

**Table F: Differences between IS patients with complete BI at 3 months and those without.**

Data are count (%) unless otherwise indicated.

\* Denotes significant trends ( $p < 0.05$ ).

Abbreviations: BI, Barthel index; CI, confidence interval; GCS, Glasgow coma scale; SD, standard deviation; and TIA, transient ischaemic attack.

|                                   | Adjusted Disability Rates (mRS $\geq$ 3) † |           |           |           | Adjusted Rate Ratio per Year (95% CI) ‡ | P Value for Trend § |
|-----------------------------------|--------------------------------------------|-----------|-----------|-----------|-----------------------------------------|---------------------|
|                                   | 2000–2003                                  | 2004–2007 | 2008–2011 | 2012–2015 |                                         |                     |
| <b>At initial assessment (7d)</b> |                                            |           |           |           |                                         |                     |
| Overall ISs                       | 58.1                                       | 58.4      | 48.5      | 45.3      | 0.979 (0.968–0.99)                      | <0.0001*            |
| By ethnicity                      |                                            |           |           |           |                                         |                     |
| White                             | 59.9                                       | 59.5      | 50.4      | 45.2      | 0.977 (0.964–0.991)                     | <0.0001*            |
| Black                             | 53.0                                       | 55.3      | 39.9      | 43.9      | 0.98 (0.958–0.999)                      | 0.006*              |
| By sex                            |                                            |           |           |           |                                         |                     |
| Male                              | 51.2                                       | 50.3      | 37.9      | 32.3      | 0.965 (0.948–0.982)                     | <0.0001*            |
| Female                            | 64.1                                       | 65.0      | 58.0      | 58.8      | 0.99 (0.975–1.005)                      | 0.048*              |
| By age group                      |                                            |           |           |           |                                         |                     |
| <55 y                             | 35.9                                       | 35.9      | 28.0      | 29.3      | 0.977 (0.952–0.999)                     | 0.041*              |
| 55+ y                             | 66.1                                       | 66.2      | 55.5      | 50.6      | 0.979 (0.966–0.992)                     | <0.0001*            |
| By TOAST subtypes                 |                                            |           |           |           |                                         |                     |
| LAA                               | 74.1                                       | 63.4      | 58.2      | 55.0      | 0.981 (0.947–0.999)                     | 0.021*              |
| CE                                | 69.9                                       | 68.6      | 61.2      | 56.1      | 0.982 (0.963–0.999)                     | 0.002*              |
| SVO                               | 38.5                                       | 41.2      | 30.0      | 24.5      | 0.965 (0.938–0.992)                     | 0.002*              |
| UND                               | 63.2                                       | 61.4      | 50.6      | 48.4      | 0.978 (0.959–0.997)                     | <0.0001*            |
| <b>At 3 months post-stroke</b>    |                                            |           |           |           |                                         |                     |
| Overall ISs                       | 43.6                                       | 38.9      | 38.1      | 35.1      | 0.984 (0.969–0.999)                     | 0.002*              |
| By ethnicity                      |                                            |           |           |           |                                         |                     |
| White                             | 43.7                                       | 37.6      | 37.2      | 37.0      | 0.986 (0.967–0.999)                     | 0.033*              |
| Black                             | 43.2                                       | 38.1      | 34.7      | 30.4      | 0.978 (0.948–0.999)                     | 0.01*               |
| By sex                            |                                            |           |           |           |                                         |                     |
| Male                              | 39.3                                       | 31.4      | 29.6      | 29.0      | 0.977 (0.954–0.999)                     | 0.004*              |
| Female                            | 47.8                                       | 46.6      | 46.3      | 41.0      | 0.99 (0.968–1.011)                      | 0.11                |
| By age group                      |                                            |           |           |           |                                         |                     |
| <55 y                             | 32.8                                       | 27.3      | 27.2      | 21.7      | 0.972 (0.939–0.999)                     | 0.015*              |
| 55+ y                             | 48.1                                       | 43.3      | 41.6      | 40.2      | 0.986 (0.968–0.999)                     | 0.011*              |
| By TOAST subtypes                 |                                            |           |           |           |                                         |                     |
| LAA ¶                             | 71.8                                       | 38.3      | 47.5      | 35.4      | 0.962 (0.92–1.007)                      | 0.002*              |
| CE                                | 52.0                                       | 47.7      | 45.2      | 45.3      | 0.992 (0.963–1.022)                     | 0.16                |
| SVO ¶                             | 29.1                                       | 27.4      | 24.5      | 22.6      | 0.978 (0.945–1.013)                     | 0.13                |
| UND                               | 46.8                                       | 43.7      | 42.6      | 37.4      | 0.982 (0.955–1.011)                     | 0.047*              |

**Table G: Trends in functional dependence (mRS  $\geq$ 3) at initial assessment and 3 months after the first-ever IS.**

Rankin scale was derived from Barthel index score (Wolfe, Taub et al. 1991).

\* Denotes significant trends ( $p < 0.05$ ).

† Unless otherwise indicated, figures are adjusted for demographic variables as appropriate. Adjusted rates for each time cohort were obtained by multiplying the observed rate for the reference period (2000–2003) by the corresponding rate ratios for the later periods from a model evaluating time cohorts as a categorical variable.

‡ Adjusted risk ratios were determined with a model evaluating calendar year as a continuous variable.

§ P values were obtained from the Cochran-Armitage tests for trend.

¶ Unadjusted because of small number of events.

Abbreviations: CE, cardio-embolism; CI, confidence interval; IS, ischaemic stroke; LAA, large-artery atherosclerosis; mRS, modified Rankin Scale; SVO, small-vessel occlusion; TOAST, Trial of ORG 10172 in Acute Stroke Treatment; UND, undetermined aetiologies.

#### References:

Wolfe, C. D., N. A. Taub, E. J. Woodrow and P. G. Burney (1991). "Assessment of scales of disability and handicap for stroke patients." *Stroke* 22(10): 1242-1244.
